# Supplementary material for: The Miocene subsidence pattern of the NW Zagros foreland basin reflects the southeastward propagating tear of the Neotethys slab
Source: Copernicus journal article supplement (doi:10.5194/se-15-1365-2024), 2024-11-25
Supplement: Supplementary file 1 [file se-15-1365-2024-supplement.zip]

## Sheet: S2A
S2. (A) Data used for the construction of the subsidence curves near mountain front flexure
BaiHasan	1.628	T
	25.3	ø
Mukdadiya	0.4	0.638	T
	28.9	55.4	ø
Injana	0.372	0.492	0.632	T
	24.7	43.2	55.7	ø
Fatha	0.33	0.383	0.421	0.505	T
	15.1	26.8	33.5	44.6	ø
Unconformity	0	0	0	0	0	T
	0	0	0	0	0	ø
Pilaspi	0.162	0.176	0.185	0.2	0.223	0.223	T
	8.6	15.8	19.9	26.1	33.6	33.6	ø
Gercus	0.09	0.105	0.115	0.136	0.171	0.171	0.2	T
	14.5	26.5	33.2	43.3	55.1	55.1	61.6	ø
Khurmala_Sinjar	0.25	0.267	0.278	0.295	0.317	0.317	0.33	0.345	T
	7.4	13.4	16.7	21.6	27	27	29.7	32.9	ø
Kolosh	0.593	0.659	0.701	0.772	0.868	0.868	0.925	0.997	1.199	T
	11.1	20	24.8	31.7	39.3	39.3	43	47.2	56	ø
Tanjero	0.102	0.11	0.115	0.122	0.13	0.13	0.133	0.137	0.142	0.252	T
	9.4	16.3	19.7	24.4	28.8	28.8	30.6	32.4	34.8	63.4	ø
Shiranish	0.429	0.452	0.464	0.481	0.499	0.499	0.506	0.514	0.524	0.741	0.741	T
	6.4	11.1	13.5	16.6	19.5	19.5	20.7	21.9	23.4	45.8	45.8	ø
Decompacted thickness of column	4.356	3.282	2.911	2.511	2.208	2.208	2.094	1.993	1.865	0.993	0.741
Avg ρ_column	2467	2446	2417	2381	2713	2713	2696	2693	2661	2679	2732
Formation	Age	Sea level	Water depth
Shiranish	77.8	0.15	0.225
Tanjero	69	0.163	0.225
Kolosh	59	0.027	0.11
Khurmala_Sinjar	49.9	0.059	0.02
Gercus	44.5	0.033	0.015
Pilaspi	39.5	0.041	0.008
Unconformity	39.5	0.041	0.008
Fatha	19	0.019	0.005
Injana	14	-0.006	0
Mukdadiya	7	-0.01	0
BaiHasan	3	-0.021	0
Total Subsidence	Tectonic Subsidence
0.966	0.193
1.218	0.259
1.975	0.589
2.013	0.461
2.109	0.518
2.216	0.513
2.216	0.513
2.516	0.678
2.911	0.787
3.282	0.864
4.356	1.129
References
Sea level	Haq, B.U. and Al-Qahtani, A.M., 2005. Phanerozoic cycles of sea-level change on the Arabian Platform. GeoArabia, 10(2), pp.127-160.
	Miller, K.G., Browning, J.V., Schmelz, W.J., Kopp, R.E., Mountain, G.S. and Wright, J.D., 2020. Cenozoic sea-level and cryospheric evolution from deep-sea geochemical and continental margin records. Science advances, 6(20), p.eaaz1346.
Water depth	Al-Sheikhly, S.S., Tamar-Agha, M.Y. and Mahdi, M.M., 2015. Basin analysis of Cretaceous to Tertiary selected wells in Kirkuk and Bai Hassan Oil Fields, Kirkuk, Northern Iraq. Iraqi Journal of Science, 56(1B), pp.435-443.
ρc	Sachsenhofer, R.F., Bechtel, A., Gratzer, R. and Rainer, T.M., 2015. Source‐rock maturity, hydrocarbon potential, and oil–source‐rock correlation in well shorish‐1, Erbil province, Kurdistan region, Iraq. Journal of Petroleum Geology, 38(4), pp.357-381.
Φo	Sachsenhofer, R.F., Bechtel, A., Gratzer, R. and Rainer, T.M., 2015. Source‐rock maturity, hydrocarbon potential, and oil–source‐rock correlation in well shorish‐1, Erbil province, Kurdistan region, Iraq. Journal of Petroleum Geology, 38(4), pp.357-381.
c	Angevine, C.L., Heller, P.L. and Paola, C., 1990. Quantitative sedimentary basin modeling.

## Sheet: S2B
S2. (B) Data used for the construction of the subsidence curves in the foredeep
BaiHasan	1	T
	28.7	ø
Mukdadiya	1.046	1.226	T
	39.9	48.7	ø
Injana	1.642	1.592	2.061	T
	28.7	26.5	43.2	ø
Fatha	0.581	0.538	0.569	0.819	T
	18.4	11.9	16.7	42.1	ø
Jeribe	0.117	0.113	0.115	0.127	0.14	T
	8	4.4	6.3	15.5	23.3	ø
Dhiban	0.102	0.093	0.097	0.121	0.15	0.159	T
	17.5	9.8	13.6	30.6	44	46.9	ø
Euphrates	0.048	0.046	0.047	0.051	0.056	0.057	0.058	T
	7.7	4	5.7	13.9	20.5	21.9	23.7	ø
Kirkuk Group	0.15	0.144	0.147	0.16	0.172	0.175	0.179	0.181	T
	7.4	3.8	5.5	13.2	19.4	20.8	22.5	23.1	ø
Jaddala	0.285	0.275	0.279	0.301	0.321	0.325	0.347	0.333	0.342	T
	6.9	3.4	4.9	11.8	17.2	18.4	23.6	20.4	22.3	ø
Aaliji	0.165	0.152	0.156	0.182	0.209	0.215	0.282	0.228	0.241	0.278	T
	14.1	6.5	9.3	22.2	32.2	34.2	49.8	37.8	41.3	48.9	ø
Unconformity	0	0	0	0	0	0	0	0	0	0	0	T
	0	0	0	0	0	0	0	0	0	0	0	ø
Shiranish	0.1	0.092	0.095	0.109	0.122	0.125	0.172	0.131	0.137	0.152	0.172	0.172	T
	13.8	6.2	8.8	20.6	29.5	31.2	49.9	34.3	37.2	43.3	49.7	49.7	ø
Decompacted thickness of column	5.236	4.27	3.566	1.871	1.17	1.056	1.039	0.873	0.72	0.43	0.172	0.172
Avg ρ_column	2497	2480	2458	2430	2384	2338	2266	2177	2044	1821	2732	2732
Formation	Age	Sea level	Water depth
Shiranish	77.8	0.15	0.225
Unconformity	69	0.15	0.225
Aaliji	53.4	0.1775	0.165
Jaddala	40.9	0.1575	0.085
Basinal Oligocene	28.4	0.1025	0.015
Euphrates	21.4	0.079	0.008
Dhiban	19	0.075	0.006
Jeribe	18	0.0685	0.006
Fatha	16	0.0186	0.005
Injana	12	-0.01	0
Mukdadiya	7	-0.01	0
BaiHasan	3	-0.0205	0
Total Subsidence	Tectonic Subsidence
0.397	0.052
0.397	0.052
0.595	0.186
0.805	0.252
0.888	0.294
1.047	0.362
1.062	0.34
1.176	0.374
1.876	0.472
3.566	0.925
4.27	1.075
5.236	1.304
References
Sea level	Haq, B.U. and Al-Qahtani, A.M., 2005. Phanerozoic cycles of sea-level change on the Arabian Platform. GeoArabia, 10(2), pp.127-160.
	Miller, K.G., Browning, J.V., Schmelz, W.J., Kopp, R.E., Mountain, G.S. and Wright, J.D., 2020. Cenozoic sea-level and cryospheric evolution from deep-sea geochemical and continental margin records. Science advances, 6(20), p.eaaz1346.
Water depth	Al-Sheikhly, S.S., Tamar-Agha, M.Y. and Mahdi, M.M., 2015. Basin analysis of Cretaceous to Tertiary selected wells in Kirkuk and Bai Hassan Oil Fields, Kirkuk, Northern Iraq. Iraqi Journal of Science, 56(1B), pp.435-443.
ρc	Sachsenhofer, R.F., Bechtel, A., Gratzer, R. and Rainer, T.M., 2015. Source‐rock maturity, hydrocarbon potential, and oil–source‐rock correlation in well shorish‐1, Erbil province, Kurdistan region, Iraq. Journal of Petroleum Geology, 38(4), pp.357-381.
Φo	Sachsenhofer, R.F., Bechtel, A., Gratzer, R. and Rainer, T.M., 2015. Source‐rock maturity, hydrocarbon potential, and oil–source‐rock correlation in well shorish‐1, Erbil province, Kurdistan region, Iraq. Journal of Petroleum Geology, 38(4), pp.357-381.
c	Angevine, C.L., Heller, P.L. and Paola, C., 1990. Quantitative sedimentary basin modeling.
