# Supplementary material for: The Miocene subsidence pattern of the NW Zagros foreland basin reflects the southeastward propagating tear of the Neotethys slab
Source: Copernicus journal article supplement (doi:10.5194/se-15-1365-2024), 2024-11-25
Supplement: Supplementary file 1 [file se-15-1365-2024-supplement.zip]

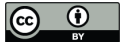

*Supplement of*

**The Miocene subsidence pattern of the NW Zagros foreland basin reflects the southeastward propagating tear of the Neotethys slab**

**Renas I. Koshnaw et al.**

*Correspondence to:* Renas I. Koshnaw ([renas.koshnaw@geo.uni-goettingen.de](mailto:renas.koshnaw@geo.uni-goettingen.de))

- [se-15-1365-2024-supplement-title-page.pdf](#)
- [SupplementaryData\\_S1\\_SolidEarth\\_rk\\_20Sept2024.xlsx](#)
- [SupplementaryData\\_S2AB\\_SolidEarth\\_rk\\_20Sept2024.xlsx](#)
- [SupplementaryData\\_S3\\_SolidEarth\\_rk\\_20Sept2024.xlsx](#)

The copyright of individual parts of the supplement might differ from the article licence.
