# Supplementary material for: The Miocene subsidence pattern of the NW Zagros foreland basin reflects the southeastward propagating tear of the Neotethys slab
Source: Copernicus journal article supplement (doi:10.5194/se-15-1365-2024), 2024-11-25
Supplement: Supplementary file 2 [file SupplementaryData_S1_SolidEarth_rk_20Sept2024.xlsx]

## Sheet: S1
S1. Data points used for consructing isopach maps
No.	Injana Formation (m)	Mukdadiy Formation (m)	Longitude	Latitude	Location	Source
1	545	365	44.1848	36.3295	Bastora_1	Koshnaw et al. (2020)
2	1155	706	44.5033	35.4247	Kirkuk	Sisskian and Al-Jibouri (2012); Al-Bahadily (2014)
3	1642	1046	44.9682	34.7294	Kifri	Koshnaw et al. (2020)
4	565	574	44.4112	36.1543	Degala	Koshnaw et al. (2020)
5	240	105	44.3393	36.4241	Mirawa	Koshnaw et al. (2020)
6	385	370	43.9378	36.8024	Dinarta	Koshnaw et al. (2020)
7	392	520	44.2298	36.646	Bekhma_SWlimb	Koshnaw et al. (2020)
8	140		43.1639	36.9384	Zawita	Tamar-Agha and Salman (2015)
9	354		42.6569	37.0889	Zakho	Tamar-Agha and Salman (2015)
10	200	50	42.8903	36.8468	N_limb Duhok anticline	Tamar-Agha et al. (1978)
11	364	250	43.5319	37.0572	Amedi	Tamar-Agha and Salman (2015)
12	300	600	45.7762	35.1075	Halabja	Sisskian and Al-Jibouri (2014)
13	450	635	44.2635	35.8805	Qushtapa	Min et al. (2012)
14	155	413	44.2992	36.7045	Bekhma_Syncline	Balaki and Omar (2019)
15	127		43.2544	36.5571	Bashiqa	Al-Juboury (2009)
16	252		43.2817	36.6245	Mandan	Aghwan et al. (2008)
17	575	630	45.3834	35.4159	Qaradagh	Koshnaw et al. (2017)
18	355	310	44.8	35.9959	Dukan	Al-Kubaisi and Barno (2015)
19	390		44.9207	35.6785	Takiya	Sissakian (1993)
20	334		43.7337	36.1929	Damir Dagh	Samad et al. (2017)
21	227	182	43.6519	35.7775	Makhmour	Sissakian (1993)
22	442	537	44.06	35.7426	Prde	Sissakian (1993)
23	303	207	43.8021	35.7042	Makhmour_2	Sissakian (1993)
24	408	445	43.9875	35.6618	BaiHasan	Fouad (2012)
25	477	372	43.9354	35.5679	Makhmour_3	Sissakian (1993)
26	270	266	43.483	36.5023	Maqlub	Balaki and Omar (2018)
27	75		41.3973	36.9945	Qamishli	Kent and Hickman (1997)
28	140	200	42.8115	37.2107	Tawke	Hayward (2014)
29	1036	751	45.2495	35.0615	Kurdamir	WesternZagros (2010)
30	1000	732	45.1201	35.1161	Topkhana	WesternZagros (2012)
31	600	328	43.9242	36.3701	Bastora_2	DNO (2013)
32	1200	1028	45.1845	34.839	Sarqala	WesternZagros (2010)
33	1450	900	45.484	34.6774	Chia Surkh	Hayward (2014)
34	1400	850	45.3297	34.4153	Qalam_Khanaqin	Hayward (2014)
35	850		44.5627	35.1757	Jambur	Al-Naqib (1959)
36	1350	1097	44.8873	34.8275	Pulkhana	ShaMaran (2009)
37	1135	800	44.796	35.1234	Taza_1	ShaMaran (2012)
38	950		45.0672	33.592	Between_TelGazal_EastBaghdad	Al-Ameri (2011); Mohammed (2006)
39	620		44.5248	34.512	Injana_TypeLocality	Sisskian and Al-Jibouri (2012)
40	340		42.5136	36.6447	Mosul	Al-Juboury_etal_2009
41	686		44.9033	34.1512	HamreenSouth	Al-Naqib (1959)
42	650		44.3227	34.6929	HamreenNorth	Al-Naqib (1959)
43		1372			Jambur_NWTauq	Sissakian (1993)
44		1067			Jambur_SETauq	Sissakian (1993)
45		580			Bardarash	Balaki and Omar (2018)
References
Aghwan et al. (2008)	Aghwan, A. T., Al-Banna, N. Y., and M. A. Al.Rashedi, 2008. Diagensis and Factor Analysis of Sandstones of Injana Formation in Selected Sections Northern Iraq. Iraqi National Journal of Earth Science, 8(1), pp.11-23
Al-Ameri (2011)	Al-Ameri, T.K., 2011. Khasib and Tannuma oil sources, East Baghdad oil field, Iraq. Marine and petroleum geology, 28(4), pp.880-894.
Al-Bahadily (2014)	Al-Bahadily, H.A., 2014. A GEOPHYSICAL STUDY OF SOME GEOLOGICAL STRUCTURES IN THE LOW FOLDED ZONE, NORTH IRAQ. Iraqi Bulletin of Geology and Mining, 10(3), pp.69-82
Al-Juboury (2009)	Al-Juboury, A.I.A., 2009. The upper Miocene Injana (upper Fars) formation of Iraq: Insights on provenance history. Arabian journal of geosciences, 2, pp.337-364.
Al-Kubaisi and Barno (2015)	Al-Kubaisi, M.S. and Barno, J.M., 2015. Fold geometry and kinematics of inversion tectonics for Kosrat anticline, northeastern Iraq. Arabian Journal of Geosciences, 8, pp.9469-9480.
Al-Naqib (1959)	Al-Naqib, K.M., 1959. Geology of the Southern area of Kirkuk Liwa, Iraq". IPC. Technical pub. London, internal report.
Balaki and Omar (2018)	Balaki, H.G.K. and Omar, A.A., 2018. Clues to inferred different thrust related fold models and thin-thick skinned tectonics within a single folded structure in Iraqi Zagros, Kurdistan region. Arabian Journal of Geosciences, 11(12), p.293.
Balaki and Omar (2019)	Balaki, H.G.K. and Omar, A.A., 2019. Structural assessment of the Bradost and Berat structures in Imbricate and High Folded zones—Iraqi Kurdistan Zagros belt. Arabian Journal of Geosciences, 12(4), p.106.
DNO (2013)	DNO International, 2013. Online corporate presentation.
Fouad (2012)	Fouad, S.F., 2012. Western Zagros fold–thrust belt, part I: The low folded zone. Iraqi Bulletin of Geology and Mining, (5), pp.39-62.
Hayward (2014)	Hayward, T. , 2014. The opening of the Kurdistan oil and gas province: the making of a nation. AAPG Search and Discovery Article, 10688, p.28.
Kent and Hickman (1997)	Kent, W.N. and Hickman, R.G., 1997. Structural development of Jebel Abd Al Aziz, northeast Syria. GeoArabia, 2(3), pp.307-330.
Koshnaw et al. (2017)	Koshnaw, R. I., Horton, B. K., Stockli, D. F., Barber, D. E., Tamar-Agha, M. Y., & Kendall, J. J., 2017. Neogene shortening and exhumation of the Zagros fold-thrust belt and foreland basin in the Kurdistan region of northern Iraq. Tectonophysics, 694, 332-355.
Koshnaw et al. (2020)	Koshnaw, R. I., Horton, B. K., Stockli, D. F., Barber, D. E., & Tamar‐Agha, M. Y., 2020. Sediment routing in the Zagros foreland basin: Drainage reorganization and a shift from axial to transverse sediment dispersal in the Kurdistan region of Iraq. Basin Research, 32(4), 688-715.
Min et al. (2012)	Min, T., Yi, J., Oh, H., Chun, Y., Bae, J., Jang, G. and Lee, S., 2012. Technical Review of the Drilling Operation of QT-1 in Block Qush tappa, Iraq. Journal of the Korean Society of Mineral and Energy Resources Engineers, 49(1), pp.80-90.
Mohammed (2006)	Mohammed, S.A., 2006. Megaseismic section across the northeastern slope of the Arabian Plate, Iraq. GeoArabia, 11(4), pp.77-90.
Samad et al. (2017)	Samad, A.I., Ahmed, A.H. and Ezzulddin, S.K., 2017. Assessment of natural radioactive concentration levels in the oil drilling wells in Erbil Governorate blocks.
ShaMaran (2012)	ShaMaran petroleum corp, 2012. Exploration & Development in Kurdistan. Online corporate presentation.
Sissakian (1993)	Sissakian, V. K., 1993. Geological Map of Kirkuk Quadrangle Sheet NI-38-2, Scale 1: 250.000, Iraq Geological Survey.
Sisskian and Al-Jibouri (2012)	Sissakian, V.K. and Al-Jibouri, B.S., 2012. Stratigraphy of the low folded zone. Iraqi Bulletin of Geology and Mining, (5), pp.63-132.
Sisskian and Al-Jibouri (2014)	Sissakian, V.K. and Al-Jiburi, B.M., 2014. Stratigraphy of the high folded zone. Iraqi Bulletin of Geology and Mining, 6, pp.73-16.
Tamar-Agha and Salman (2015)	Tamar-Agha, M.Y. and Salman, N.A., 2015. Facies and Depositional Environments of Injana Formation in Zawita, Amadia and Zakho Areas, Northern Iraq. Iraqi Bulletin of Geology and Mining, 11(3), pp.39-59.
Tamar-Agha et al. (1978)	Agha, T. M., Numan, N. M. S., and K. Ma’ala, 1978. Field Guide for the Geology of the Duhok and Sinjar Areas, Fifth Iraqi Geological Congress, Baghdad, Iraq
WesternZagros (2010)	WesternZagros Resources Ltd., 2010.Online corporate presentation.
WesternZagros (2012)	WesternZagros Resources Ltd., 2012. Online corporate presentation.
