# Supplementary material for: The Miocene subsidence pattern of the NW Zagros foreland basin reflects the southeastward propagating tear of the Neotethys slab
Source: Copernicus journal article supplement (doi:10.5194/se-15-1365-2024), 2024-11-25
Supplement: Supplementary file 4 [file SupplementaryData_S3_SolidEarth_rk_20Sept2024.xlsx]

## Sheet: S3
S3. Used data for creating the flexural profile
Parameters					*Variable elastic thicknesses below the tectonic load (30-50 km from the MZF to the MFF) and a constant elastic thickness below the sedimentary load (50 km) were used. The elastic thickness variation was estimated based on Saura et al. (2015) and Pirouz et al. (2017). A balanced cross-section (Koshnaw et al., 2020a) across the NW Zagros fold-thrust belt and foreland basin was used as a base for t…
Young modulus (GPa)	70
Poisson ratio	0.25
Interval of computaion	5 km
Mantle density	3300 kg/m3
Tectonic load density	2700 kg/m3
Sedimentary load density	2300 kg/m3
Elastic thickness from the suture zone to the foreland
x (km)	Et (km)
0	30
10	32
20	34
30	36
40	38
50	40
60	42
70	44
80	46
90	48
100	50
600	50
Input*
xmin	xmax	h	density
0	5	3500	2700
5	10	3500	2700
10	15	3600	2700
15	20	3700	2700
20	25	3200	2700
25	30	3300	2700
30	35	3700	2700
35	40	3400	2700
40	45	3200	2700
45	50	3350	2700
50	55	3500	2700
55	60	3500	2700
60	65	3600	2700
65	70	3500	2700
70	75	4200	2700
75	80	3600	2700
80	85	3400	2300
85	90	3200	2300
90	95	3100	2300
95	100	3200	2300
100	105	3250	2300
105	110	3300	2300
110	115	3550	2300
115	120	3550	2300
120	125	3500	2300
125	130	3400	2300
130	135	3300	2300
135	140	3250	2300
140	145	3000	2300
145	150	2950	2300
150	155	2950	2300
155	160	2850	2300
160	165	2800	2300
165	170	2750	2300
170	175	2700	2300
175	180	2700	2300
180	185	2700	2300
185	190	2750	2300
190	195	2700	2300
195	200	2650	2300
200	205	2650	2300
205	210	2700	2300
210	215	2700	2300
215	220	2600	2300
220	225	2600	2300
225	230	2600	2300
230	235	2600	2300
235	240	2600	2300
*Balanced cross section subdivided into 5 km intervals, and height and density of rock columns above the reference line were considered
